# Supplementary material
Source: Springer Nature journal article supplement (https://www.springermedizin.de/resource/supplementary/12957_2012_1613_MOESM4_ESM.pdf/9563930)
Supplement: MOESM4 [file 9563930]

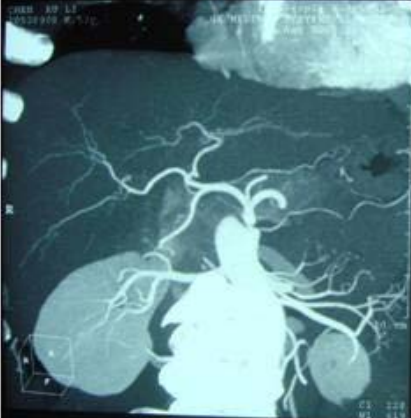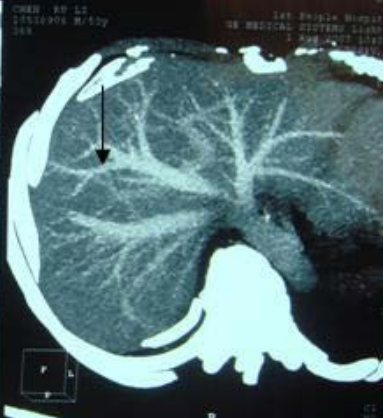

WED 00 12  
10510908 M/170  
1st People Hospital  
GE MEDICAL SYSTEMS LightSpeed  
1 Aug 2007 10:07:29.0  
100KV, 12mAs  
NO 350.0 mm  
PM 18.76 mm  
S 1.00  
CI 120  
M1 819

WED 00 12  
10510908 M/170  
1st People Hospital  
GE MEDICAL SYSTEMS LightSpeed  
1 Aug 2007 10:07:29.0  
100KV, 12mAs  
NO 350.0 mm  
PM 18.76 mm  
S 1.00  
CI 120  
M2 819
